# Supplementary material for: Isoniazid and rifapentine treatment effectively reduces persistent M. tuberculosis infection in macaque lungs
Source: JCI journal article supplement (doi:10.1172/jci161564), 2022-07-21
Supplement: sd1 [file 1]

301 Moved Permanently

# Moved Permanently

The document has moved here.
