# Supplementary material for: Isoniazid and rifapentine treatment effectively reduces persistent M. tuberculosis infection in macaque lungs
Source: JCI journal article supplement (doi:10.1172/jci161564), 2022-07-21
Supplement: sd1 [file 1]

| Animal ID                                                                                                                                                                                                                                                                                                    | Group       | Sex    | Age (Years) | 3HP Initiation   | MAMU Type* |          |          |
|--------------------------------------------------------------------------------------------------------------------------------------------------------------------------------------------------------------------------------------------------------------------------------------------------------------|-------------|--------|-------------|------------------|------------|----------|----------|
|                                                                                                                                                                                                                                                                                                              |             |        |             |                  | A*01       | B*08     | B*17     |
| 32620                                                                                                                                                                                                                                                                                                        | 3HP treated | Male   | 8           | 12 weeks post-TB | Negative   | Negative | Positive |
| 34021                                                                                                                                                                                                                                                                                                        | 3HP treated | Male   | 6           | 12 weeks post-TB | Negative   | Negative | Negative |
| 34332                                                                                                                                                                                                                                                                                                        | 3HP treated | Male   | 7           | 12 weeks post-TB | Negative   | Negative | Positive |
| 31286                                                                                                                                                                                                                                                                                                        | 3HP treated | Female | 10          | 12 weeks post-TB | Negative   | Negative | Positive |
| 36029                                                                                                                                                                                                                                                                                                        | 3HP treated | Male   | 5           | 12 weeks post-TB | Negative   | Negative | Positive |
| 36769                                                                                                                                                                                                                                                                                                        | 3HP treated | Male   | 4           | 12 weeks post-TB | Negative   | Negative | Negative |
| 32622                                                                                                                                                                                                                                                                                                        | Untreated   | Male   | 8           | No treatment     | Negative   | Negative | Negative |
| 33546                                                                                                                                                                                                                                                                                                        | Untreated   | Female | 6           | No treatment     | Negative   | Negative | Negative |
| 33997                                                                                                                                                                                                                                                                                                        | Untreated   | Male   | 7           | No treatment     | Negative   | Positive | Negative |
| 31438                                                                                                                                                                                                                                                                                                        | Untreated   | Female | 10          | No treatment     | Neagtive   | Negative | Positive |
| 36462                                                                                                                                                                                                                                                                                                        | Untreated   | Female | 10          | No treatment     | Negative   | Negative | Negative |
| 36463                                                                                                                                                                                                                                                                                                        | Untreated   | Female | 10          | No treatment     | Negative   | Negative | Negative |
| <p>*MAMU Type: The major histocompatibility complex is key to initiating adaptive immune responses in vertebrates. Orthologues of the HLA class I and II genes have been indentified in rhesus macaques named as <i>Mamu-A</i>, <i>Mamu-B</i> . Shown here are the MHC genotyping of the study macaques.</p> |             |        |             |                  |            |          |          |

Table 1.

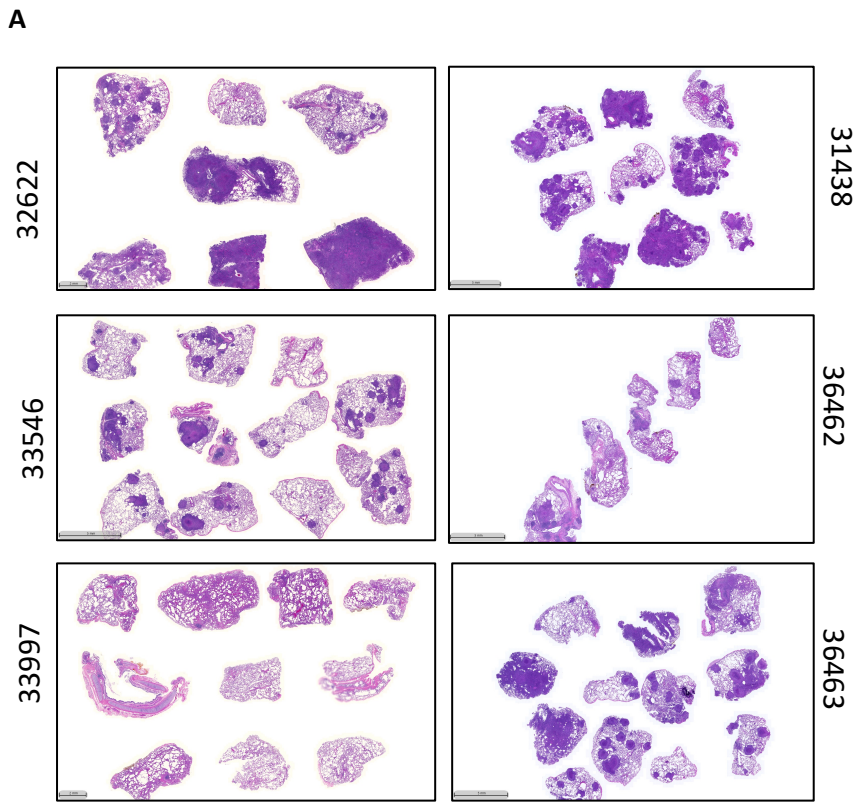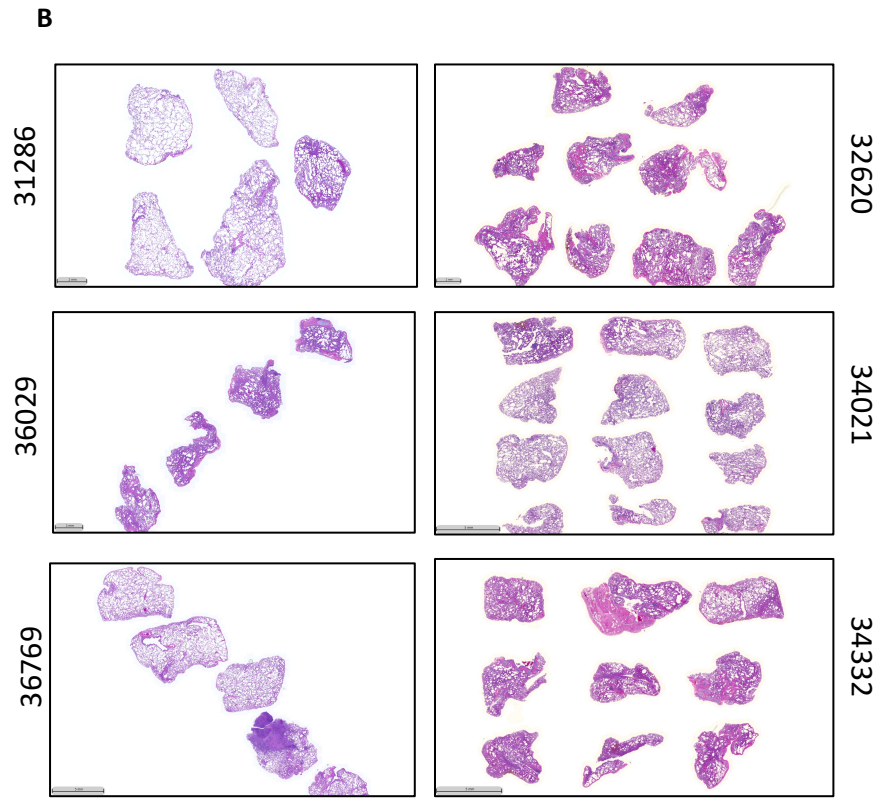

Figure S1.

**Figure S1.** Gross pathology of lung tissue at study end point in (A) untreated control and (B) 3HP-treated rhesus macaques. Detailed histopathology analysis of stereologically collected samples from all animals demonstrated robust granulomatous inflammation in the untreated group, suggestive of SIV-induced reactivation. Untreated animals demonstrated well-formed granulomas with caseous central areas, multifocal histiocytic to mixed inflammation (immature granulomas) and increased bronchus-associated lymphoid tissue.
